# Supplementary material for: Can We Use Functional Genetics to Predict the Fate of Nitrogen in Estuaries?
Source: Front Microbiol. 2020 Jun 11;11:1261. doi: 10.3389/fmicb.2020.01261 (PMC7325967; doi:10.3389/fmicb.2020.01261)
Supplement: Supplementary file 3 [file Data_Sheet_3.csv]

Biosample	Sample_identifier	Estuary location	Sample code	Time	Depth (cm)
BioSample: SAMN14516227	63171	Patterson river	Pat 1A	T1	0.25
BioSample: SAMN14516228	63172	Aire river	Air 1B	T1	0.75
BioSample: SAMN14516229	63173	Werribee river	Wr 1B	T1	0.75
BioSample: SAMN14516230	63174	Yarra river	Yr 6A	T6	0.25
BioSample: SAMN14516231	63175	Lake King North	Lkn 1A	T1	0.25
BioSample: SAMN14516232	63176	Tamboon inlet	Tam 1B	T1	0.75
BioSample: SAMN14516233	63177	Lake Wellington	LW 1D	T1	2.5
BioSample: SAMN14516234	63178	Curdies river	Cur 6B	T6	0.75
BioSample: SAMN14516235	63179	Patterson river	Pat 1B	T1	0.75
BioSample: SAMN14516236	63180	Aire river	Air 1C	T1	1.5
BioSample: SAMN14516237	63181	Werribee river	Wr 1C	T1	1.5
BioSample: SAMN14516238	63182	Tamboon inlet	Tam 1A	T1	0.25
BioSample: SAMN14516239	63183	Lake King North	Lkn 1F	T1	7.5
BioSample: SAMN14516240	63184	Tamboon inlet	Tam 1C	T1	1.5
BioSample: SAMN14516241	63185	Hopkins river	Hop 1E	T1	4
BioSample: SAMN14516242	63186	Curdies river	Cur 6C	T6	1.5
BioSample: SAMN14516243	63187	Patterson river	Pat 1C	T1	1.5
BioSample: SAMN14516244	63188	Aire river	Air 1D	T1	2.5
BioSample: SAMN14516245	63189	Werribee river	Wr 1D	T1	2.5
BioSample: SAMN14516246	63190	Tamboon inlet	Tam 1F	T1	7.5
BioSample: SAMN14516247	63191	Lake King North	Lkn 6A	T6	0.25
BioSample: SAMN14516248	63192	Tamboon inlet	Tam 1D	T1	2.5
BioSample: SAMN14516249	63193	Hopkins river	Hop 6B	T6	0.75
BioSample: SAMN14516250	63194	Curdies river	Cur 6D	T6	2.5
BioSample: SAMN14516251	63195	Patterson river	Pat 1D	T1	2.5
BioSample: SAMN14516252	63196	Aire river	Air 1E	T1	4
BioSample: SAMN14516253	63197	Werribee river	Wr 1E	T1	4
BioSample: SAMN14516254	63198	Tamboon inlet	Tam 6A	T6	0.25
BioSample: SAMN14516255	63199	Lake Wellington	LW 1A	T1	0.25
BioSample: SAMN14516256	63200	Tamboon inlet	Tam 1E	T1	4
BioSample: SAMN14516257	63201	Hopkins river	Hop 6C	T6	1.5
BioSample: SAMN14516258	63202	Curdies river	Cur 6E	T6	4
BioSample: SAMN14516259	63203	Patterson river	Pat 1E	T1	4
BioSample: SAMN14516260	63204	Aire river	Air 1F	T1	7.5
BioSample: SAMN14516261	63205	Werribee river	Wr 1F	T1	7.5
BioSample: SAMN14516262	63206	Wingan river	Win 1A	T1	0.25
BioSample: SAMN14516263	63207	Lake Wellington	LW 1F	T1	7.5
BioSample: SAMN14516264	63208	Tamboon inlet	Tam 6B	T6	0.75
BioSample: SAMN14516265	63209	Hopkins river	Hop 6D	T6	2.5
BioSample: SAMN14516266	63210	Curdies river	Cur 6F	T6	7.5
BioSample: SAMN14516267	63211	Patterson river	Pat 1F	T1	7.5
BioSample: SAMN14516268	63212	Aire river	Air 6A	T6	0.25
BioSample: SAMN14516269	63213	Werribee river	Wr 6A	T6	0.25
BioSample: SAMN14516270	63214	Wingan river	Win 1F	T1	7.5
BioSample: SAMN14516271	63215	Lake Wellington	LW 6A	T6	0.25
BioSample: SAMN14516272	63216	Tamboon inlet	Tam 6C	T6	1.5
BioSample: SAMN14516273	63217	Hopkins river	Hop 6E	T6	4
BioSample: SAMN14516274	63218	Wingan river	Win 1B	T1	0.75
BioSample: SAMN14516275	63219	Patterson river	Pat 6A	T6	0.25
BioSample: SAMN14516276	63220	Aire river	Air 6B	T6	0.75
BioSample: SAMN14516277	63221	Werribee river	Wr 6B	T6	0.75
BioSample: SAMN14516278	63222	Wingan river	Win 6A	T6	0.25
BioSample: SAMN14516279	63223	Hopkins river	Hop 1A	T1	0.25
BioSample: SAMN14516280	63224	Tamboon inlet	Tam 6D	T6	2.5
BioSample: SAMN14516281	63225	Hopkins river	Hop 6F	T6	7.5
BioSample: SAMN14516282	63226	Wingan river	Win 1C	T1	1.5
BioSample: SAMN14516283	63227	Patterson river	Pat 6B	T6	0.75
BioSample: SAMN14516284	63228	Aire river	Air 6C	T6	1.5
BioSample: SAMN14516285	63229	Werribee river	Wr 6C	T6	1.5
BioSample: SAMN14516286	63230	Malacoota	Mal 6A	T6	0.25
BioSample: SAMN14516287	63231	Hopkins river	Hop 1B	T1	0.75
BioSample: SAMN14516288	63232	Tamboon inlet	Tam 6E	T6	4
BioSample: SAMN14516289	63233	Curdies river	Cur 1B	T1	0.75
BioSample: SAMN14516290	63234	Wingan river	Win 1D	T1	2.5
BioSample: SAMN14516291	63235	Patterson river	Pat 6C	T6	1.5
BioSample: SAMN14516292	63236	Aire river	Air 6D	T6	2.5
BioSample: SAMN14516293	63237	Werribee river	Wr 6D	T6	2.5
BioSample: SAMN14516294	63238	Malacoota	Mal 1A	T1	0.25
BioSample: SAMN14516295	63239	Hopkins river	Hop 1C	T1	1.5
BioSample: SAMN14516296	63240	Tamboon inlet	Tam 6F	T6	7.5
BioSample: SAMN14516297	63241	Curdies river	Cur 1C	T1	1.5
BioSample: SAMN14516298	63242	Wingan river	Win 1E	T1	4
BioSample: SAMN14516299	63243	Patterson river	Pat 6D	T6	2.5
BioSample: SAMN14516300	63244	Aire river	Air 6E	T6	4
BioSample: SAMN14516301	63245	Werribee river	Wr 6E	T6	4
BioSample: SAMN14516302	63246	Malacoota	Mal 1F	T1	7.5
BioSample: SAMN14516303	63247	Hopkins river	Hop 1D	T1	2.5
BioSample: SAMN14516304	63248	Lake Wellington	LW 1B	T1	0.75
BioSample: SAMN14516305	63249	Curdies river	Cur 1D	T1	2.5
BioSample: SAMN14516306	63250	Wingan river	Win 6B	T6	0.75
BioSample: SAMN14516307	63251	Patterson river	Pat 6E	T6	4
BioSample: SAMN14516308	63252	Aire river	Air 6F	T6	7.5
BioSample: SAMN14516309	63253	Yarra river	Yr 1A	T1	0.25
BioSample: SAMN14516310	63254	Curdies river	Cur 1A	T1	0.25
BioSample: SAMN14516311	63255	Hopkins river	Hop 1F	T1	7.5
BioSample: SAMN14516312	63256	Lake Wellington	LW 1C	T1	1.5
BioSample: SAMN14516313	63257	Curdies river	Cur 1E	T1	4
BioSample: SAMN14516314	63258	Wingan river	Win 6C	T6	1.5
BioSample: SAMN14516315	63259	Aire river	Air 1A	T1	0.25
BioSample: SAMN14516316	63260	Werribee river	Wr 1A	T1	0.25
BioSample: SAMN14516317	63261	Yarra river	Yr 1F	T1	7.5
BioSample: SAMN14516318	63262	Curdies river	Cur 6A	T6	0.25
BioSample: SAMN14516319	63263	Hopkins river	Hop 6A	T6	0.25
BioSample: SAMN14516320	63264	Lake Wellington	LW 1E	T1	4
BioSample: SAMN14516321	63265	Curdies river	Cur 1F	T1	7.5
BioSample: SAMN14516322	63266	Wingan river	Win 6D	T6	2.5
BioSample: SAMN14516323	63267	Wingan river	Win 6E	T6	4
BioSample: SAMN14516324	63268	Wingan river	Win 6F	T6	7.5
BioSample: SAMN14516325	63269	Malacoota	Mal 1B	T1	0.75
BioSample: SAMN14516326	63270	Malacoota	Mal 1C	T1	1.5
BioSample: SAMN14516327	63271	Malacoota	Mal 1D	T1	2.5
BioSample: SAMN14516328	63272	Malacoota	Mal 1E	T1	4
BioSample: SAMN14516329	63273	Malacoota	Mal 6B	T6	0.75
BioSample: SAMN14516330	63274	Malacoota	Mal 6C	T6	1.5
BioSample: SAMN14516331	63275	Malacoota	Mal 6D	T6	2.5
BioSample: SAMN14516332	63276	Malacoota	Mal 6E	T6	4
BioSample: SAMN14516333	63277	Malacoota	Mal 6F	T6	7.5
BioSample: SAMN14516334	63278	Lake King North	Lkn 6F	T6	7.5
BioSample: SAMN14516335	63279	Lake Wellington	LW 6B	T6	0.75
BioSample: SAMN14516336	63280	Lake Wellington	LW 6C	T6	1.5
BioSample: SAMN14516337	63281	Lake Wellington	LW 6D	T6	2.5
BioSample: SAMN14516338	63282	Lake Wellington	LW 6E	T6	4
BioSample: SAMN14516339	63283	Lake Wellington	LW 6F	T6	7.5
BioSample: SAMN14516340	63284	Yarra river	Yr 1B	T1	0.75
BioSample: SAMN14516341	63285	Yarra river	Yr 1C	T1	1.5
BioSample: SAMN14516342	63286	Lake King North	Lkn 1B	T1	0.75
BioSample: SAMN14516343	63287	Lake King North	Lkn 1C	T1	1.5
BioSample: SAMN14516344	63288	Lake King North	Lkn 1D	T1	2.5
BioSample: SAMN14516345	63289	Lake King North	Lkn 1E	T1	4
BioSample: SAMN14516346	63290	Lake King North	Lkn 6B	T6	0.75
BioSample: SAMN14516347	63291	Lake King North	Lkn 6C	T6	1.5
BioSample: SAMN14516348	63292	Lake King North	Lkn 6D	T6	2.5
BioSample: SAMN14516349	63293	Lake King North	Lkn 6E	T6	4
BioSample: SAMN14516350	63294	Yarra river	Yr 1D	T1	2.5
BioSample: SAMN14516351	63295	Yarra river	Yr 6B	T6	0.75
BioSample: SAMN14516352	63296	Yarra river	Yr 1E	T1	4
BioSample: SAMN14516353	63297	Yarra river	Yr 6C	T6	1.5
BioSample: SAMN14516354	63298	Yarra river	Yr 6D	T6	2.5
BioSample: SAMN14516355	63299	Yarra river	Yr 6F	T6	7.5
BioSample: SAMN14516356	63300	Patterson river	Pat 6F	T6	7.5
BioSample: SAMN14516357	63301	Werribee river	Wr 6F	T6	7.5
